# Supplementary material
Source: HighWire-hosted journal article supplement (http://qhc.bmj.com/highwire/filestream/147586/field_highwire_adjunct_files/0/bmjqs-2012-001616supp.pdf)
Supplement: bmjqs-2012-001616supp.pdf [file bmjqs-2012-001616supp.pdf]

## Projected Cost Savings of Implementing Video-oculography for Diagnosis of Dizziness in US EDs

David E. Newman-Toker MD PhD, Associate Professor of Neurology, Johns Hopkins University School of Medicine

Dizziness and vertigo lead to 4 million US emergency department (ED) visits annually at a cost of \$4 billion.<sup>1</sup> Hundreds of millions of dollars are spent on neuroimaging trying to detect the ~5%<sup>2-7</sup> of patients who have life-threatening posterior fossa strokes causing their dizziness or vertigo—yet one-third of these vestibular strokes are missed.<sup>2,8</sup> In addition, most of the ~1 million dizziness and vertigo patients with benign inner ear causes are over-tested,<sup>9</sup> misdiagnosed,<sup>10</sup> and undertreated.<sup>11</sup> Accurate and efficient diagnosis will save lives through prompt and appropriate treatments while reducing costs and harms by eliminating inappropriate over-testing. Our approach to diagnosis of ED dizziness uses device-based measurement of acute oculomotor physiology by portable video-oculography (VOG), the conceptual equivalent of an ‘EKG’ machine for acute dizziness.<sup>12</sup>

Our team is experienced in US national resource utilization and economic analyses for ED dizziness.<sup>1,4,9,13-15</sup> For high-risk patients, VOG would save lives via improved stroke care (Figure). For low-risk patients, VOG would save ~\$1 billion per year by safely reducing testing (Tables). **Thus, VOG would save lives and money.**

We have modeled the benefits in quality-adjusted life years of more accurately diagnosing and treating strokes at the initial ED visit and find that we can substantially improve patient safety and patient outcomes at very reasonable cost by promptly diagnosing vestibular strokes and correctly applying currently-available stroke treatments (Figure).<sup>14</sup> We modeled cost-effectiveness of our novel approach,<sup>14</sup> focusing on variable costs and effects related to diagnosis of strokes among ED patients with acute, continuous dizziness (~15% of all ED patients with dizziness or vertigo, and who are at highest stroke risk). We compared two general, routine diagnostic strategies (MRI all, admit all) to current practice and our proposed strategy (bedside VOG to inform decision-making). We used national prevalence and utilization data<sup>4,9</sup> and diagnostic accuracy estimates<sup>17</sup> from our prior studies. We did not consider fixed costs of diagnostic or hospital equipment. We calculated incremental cost-effectiveness ratios (ICERs) from a societal perspective using dollars and quality-adjusted life years (QALYs).

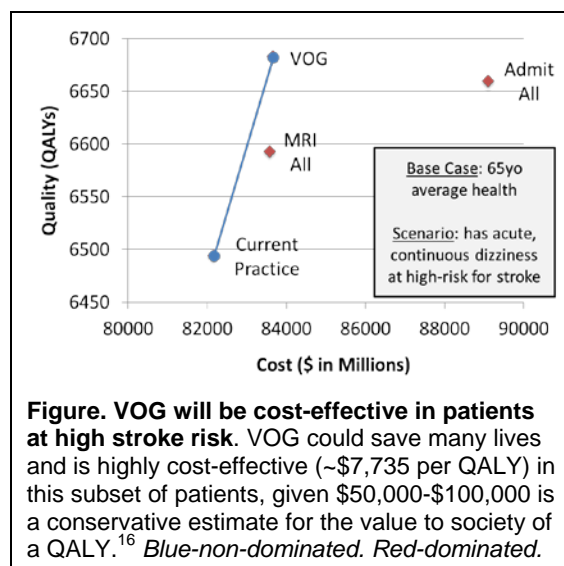

Projected cost savings from implementing VOG-based diagnosis for ED dizziness derive predominantly from reducing brain CT overuse and eliminating unnecessary admissions for benign inner ear conditions. CTs are insensitive for stroke and rarely indicated in ED dizziness.<sup>1</sup> Greater CT use does not improve diagnosis.<sup>15,18</sup> Inner ear diseases should be diagnosed by bedside eye movement assessment,<sup>19</sup> which can be done by VOG. When imaging is required to search for stroke, the correct imaging test is brain MRI, not CT.<sup>1</sup> Cost savings are counterbalanced partially by an increase in appropriate brain MRI use to improve stroke detection, but **the net savings are projected to be \$0.5 – 1.5 billion annually** in workup costs for ED dizziness, approximately 35% of which are borne directly by Federal and State public insurance programs such as Medicare and Medicaid.<sup>4</sup>

**Table 1. Cost savings of implementing VOG approach nationally using variable projections of effects on physician behavior**

| For All ED Dizziness                                      | Current (2013 US National <sup>1,4</sup> ) | Conservative Projection | Intermediate Projection | Optimistic Projection  |
|-----------------------------------------------------------|--------------------------------------------|-------------------------|-------------------------|------------------------|
| <i>ED CT Reduction from Current Baseline</i>              | 0%                                         | 50%                     | 75%                     | 90%                    |
| All ED Dizziness CT Rate                                  | 41.2%                                      | 20.6%                   | 10.3%                   | 4.1%                   |
| <i>ED MRI Increase from Current Baseline</i>              | 0%                                         | 50%                     | 25%                     | 0%                     |
| All ED Dizziness MRI Rate                                 | 2.4%                                       | 3.6%                    | 3.0%                    | 2.4%                   |
| <i>Anticipated Admit Rate Reduction for Ear Disorders</i> | 0%                                         | 25%                     | 50%                     | 75%                    |
| All ED Dizziness Admission Rate                           | 18.8%                                      | 18.0%                   | 17.2%                   | 16.4%                  |
| <b>Total ED/Hospital Workup Costs</b>                     | <b>\$9,242,624,941</b>                     | <b>\$8,703,997,576</b>  | <b>\$8,198,729,820</b>  | <b>\$7,735,623,708</b> |
| <b>Total Annual US Healthcare Cost Savings</b>            | <b>\$0</b>                                 | <b>\$538,627,365</b>    | <b>\$1,043,895,121</b>  | <b>\$1,507,001,233</b> |
| <b>Public (Federal/State) Insurance Cost Savings</b>      | <b>\$0</b>                                 | <b>\$186,903,696</b>    | <b>\$362,231,607</b>    | <b>\$522,929,428</b>   |

**Table 2. Parameter estimates (with sources cited) for cost savings calculations elaborated in Table 1**

| PARAMETER                                                                                         | VALUE     |
|---------------------------------------------------------------------------------------------------|-----------|
| Total ED dizziness visits national estimate for 2013 <sup>1</sup>                                 | 4,135,000 |
| Stroke fraction of all ED dizziness <sup>2-7</sup>                                                | 5.0%      |
| Symptom-only diagnosis (ICD-9 780.4) fraction of all ED dizziness <sup>4</sup>                    | 22.1%     |
| Symptom-only diagnosis (ICD-9 780.4) current admission rate <sup>9</sup>                          | 11.8%     |
| Peripheral vestibular fraction of all ED dizziness <sup>9</sup>                                   | 7.4%      |
| Peripheral vestibular current admission rate <sup>9</sup>                                         | 8.3%      |
| CMS 2012 payment average CT brain (without or with contrast) <sup>20</sup>                        | \$315     |
| CMS 2012 payment typical stroke protocol MRI brain <sup>21</sup>                                  | \$1,204   |
| Average total Medicare payment per hospital discharge (all DRGs) <sup>22</sup>                    | \$11,205  |
| Fraction of ED dizziness patients using US Federal/State government health insurance <sup>4</sup> | 34.7%     |

## References (research team member names bolded)

1. Saber-Tehrani AS, Coughlan D, Hsieh YH, Mantokoudis G, Korley FK, **Kerber KA, Frick KD, Newman-Toker DE**. Rising annual costs of dizziness presentations to US emergency departments. *Acad Emerg Med*. 2013 (in press).
2. **Kerber KA**, Brown DL, Lisabeth LD, Smith MA, Morgenstern LB. Stroke among patients with dizziness, vertigo, and imbalance in the emergency department: a population-based study. *Stroke*. 2006;37(10):2484-7. PMID: 1779945.
3. Lam JMY, Siu WS, Lam TS, Cheung NK, Graham CA, Rainer TH. The epidemiology of patients with dizziness in an emergency department. *Hong Kong J Emerg Med*. 2006;13:133-9.
4. **Newman-Toker DE**, Hsieh YH, Camargo CA, Jr., Pelletier AJ, Butchy GT, Edlow JA. Spectrum of dizziness visits to US emergency departments: cross-sectional analysis from a nationally representative sample. *Mayo Clin Proc*. 2008;83(7):765-75.
5. Cheung CS, Mak PS, Manley KV, Lam JM, Tsang AY, Chan HM, Rainer TH, Graham CA. Predictors of important neurological causes of dizziness among patients presenting to the emergency department. *Emerg Med J*. 2010;27(7):517-21.
6. Royl G, Ploner CJ, Leithner C. Dizziness in the emergency room: diagnoses and misdiagnoses. *European neurology*. 2011;66(5):256-63.
7. Navi BB, Kamel H, Shah MP, Grossman AW, Wong C, Poisson SN, Whetstone WD, Josephson SA, Johnston SC, Kim AS. Rate and predictors of serious neurologic causes of dizziness in the emergency department. *Mayo Clinic proceedings Mayo Clinic*. 2012;87(11):1080-8.
8. Masuda Y, Tei H, Shimizu S, Uchiyama S. Factors Associated with the Misdiagnosis of Cerebellar Infarction. *Journal of stroke and cerebrovascular diseases : the official journal of National Stroke Association*. 2012.
9. **Newman-Toker DE**, Camargo CA, Jr., Hsieh YH, Pelletier AJ, Edlow JA. Disconnect between charted vestibular diagnoses and emergency department management decisions: a cross-sectional analysis from a nationally representative sample. *Acad Emerg Med*. 2009;16(10):970-7.
10. **Kerber KA**, Morgenstern LB, **Meurer WJ**, McLaughlin T, Hall PA, Forman J, Fendrick AM, **Newman-Toker DE**. Nystagmus assessments documented by emergency physicians in acute dizziness presentations: a target for decision support? *Acad Emerg Med*. 2011;18(6):619-26. PMID: 3117268.
11. **Kerber KA**, Burke JF, Skolarus LE, **Meurer WJ**, Callaghan BC, Brown DL, Lisabeth LD, McLaughlin TJ, Fendrick AM, Morgenstern LB. Use of BPPV Processes in Emergency Department Dizziness Presentations: A Population-Based Study. *Otolaryngology--Head and Neck Surgery*. 2012.
12. **Newman-Toker DE**, Tehrani AS, Mantokoudis G, Pula JH, Guede CI, **Kerber KA, Blitz A**, Ying SH, Hsieh YH, **Rothman RE, Hanley DF, Zee DS, Kattah JC**. Quantitative Video-Oculography to Help Diagnose Stroke in Acute Vertigo and Dizziness: Toward an ECG for the Eyes. *Stroke*. 2013.
13. **Kerber KA, Meurer WJ**, West BT, Fendrick AM. Dizziness presentations in U.S. emergency departments, 1995-2004. *Acad Emerg Med*. 2008;15(8):744-50.
14. **Newman-Toker DE**, Butchy GT, Lehmann HP, Aldrich EM, Chanmugam A, **Frick KD**. Diagnostic decision support to reduce stroke misdiagnosis among acutely dizzy patients: a cost effectiveness analysis [abstract]. *Neurology*. 2009;72(11 Suppl 3):A185-A.
15. **Kerber KA**, Schweigler L, West BT, Fendrick AM, Morgenstern LB. Value of computed tomography scans in ED dizziness visits: analysis from a nationally representative sample. *Am J Emerg Med*. 2010;28(9):1030-6. PMID: 2967633.
16. Dranove D. *What's your life worth? : health care rationing-- who lives? who dies? who decides?* Upper Saddle River, NJ: FT Prentice Hall; 2003.
17. Tarnutzer AA, Berkowitz AL, Robinson KA, Hsieh YH, **Newman-Toker DE**. Does my dizzy patient have a stroke? A systematic review of bedside diagnosis in acute vestibular syndrome. *CMAJ : Canadian Medical Association journal*. 2011;183(9):E571-92. PMID: 3114934.
18. Kim AS, Sidney S, Klingman JG, Johnston SC. Practice variation in neuroimaging to evaluate dizziness in the ED. *The American journal of emergency medicine*. 2012;30(5):665-72.
19. **Newman-Toker DE**. Symptoms and Signs of Neuro-otologic Disorders. *Continuum (Minneapolis, Minn)*. 2012;18(5 Neuro-otology):1016-40.
20. 2012 Medicare Hospital Outpatient Prospective Payment Schedule Rates: Computed Tomography Procedures. Siemens Medical Solutions USA, Inc; 2012. Contract No. A912HQ-OTHER-121776-P1-4A00. Available from: [http://www.medical.siemens.com/siemens/en\\_US/rg\\_marcom\\_FBAs/files/Reimbursement/CT\\_2012\\_Final\\_HOPPS\\_Payment\\_Rates.pdf](http://www.medical.siemens.com/siemens/en_US/rg_marcom_FBAs/files/Reimbursement/CT_2012_Final_HOPPS_Payment_Rates.pdf). Access verified March 24, 2013.
21. 2012 Medicare Hospital Outpatient Prospective Payment Schedule Rates: Magnetic Resonance Imaging: Siemens Medical Solutions USA, Inc; 2012. Contract No. A912HQ-OTHER-121776-P1-4A00. Available from: [http://www.medical.siemens.com/siemens/en\\_US/rg\\_marcom\\_FBAs/files/Reimbursement/MR\\_2012\\_Final\\_HOPPS\\_Payment\\_Rates.pdf](http://www.medical.siemens.com/siemens/en_US/rg_marcom_FBAs/files/Reimbursement/MR_2012_Final_HOPPS_Payment_Rates.pdf). Access verified March 24, 2013.
22. Schuhmann TM. Understanding variation in Medicare inpatient payment. Healthcare Financial Management Association 2010. Available from: [http://www.costreportdata.com/HFM-VariationInMedicareInPPayment\\_OCT10.pdf](http://www.costreportdata.com/HFM-VariationInMedicareInPPayment_OCT10.pdf). Access verified April 10, 2013.
